# Supplementary figures and images for: Prospective randomized study of sexual function in men taking dutasteride for the treatment of androgenetic alopecia
Source: PubMed Central journal article supplement — J Dermatol. 2018 Apr 18;45(7):799–804. doi: 10.1111/1346-8138.14329 (PMC6055634; doi:10.1111/1346-8138.14329), 2018-04-18

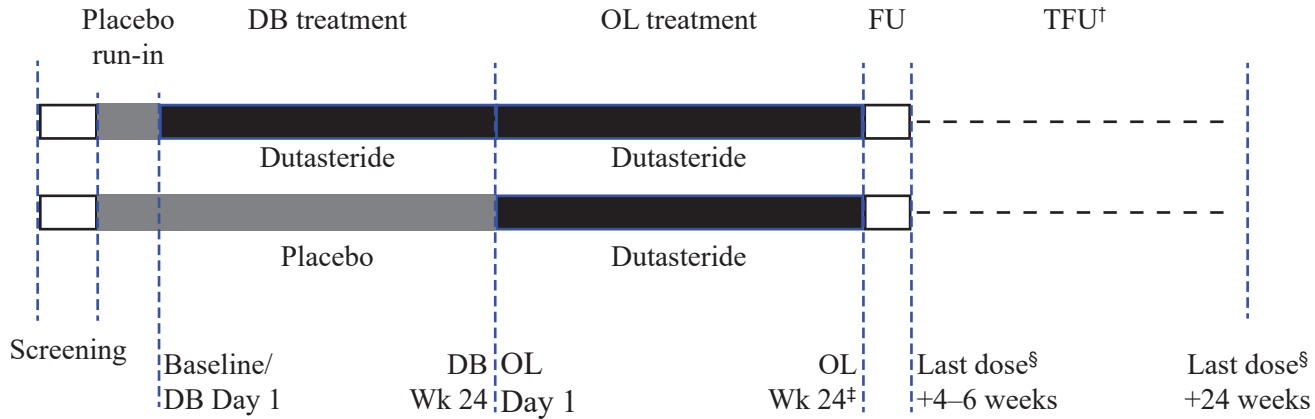

Supplement: JDE-45-799-s002.pdf [file JDE-45-799-s002.pdf]

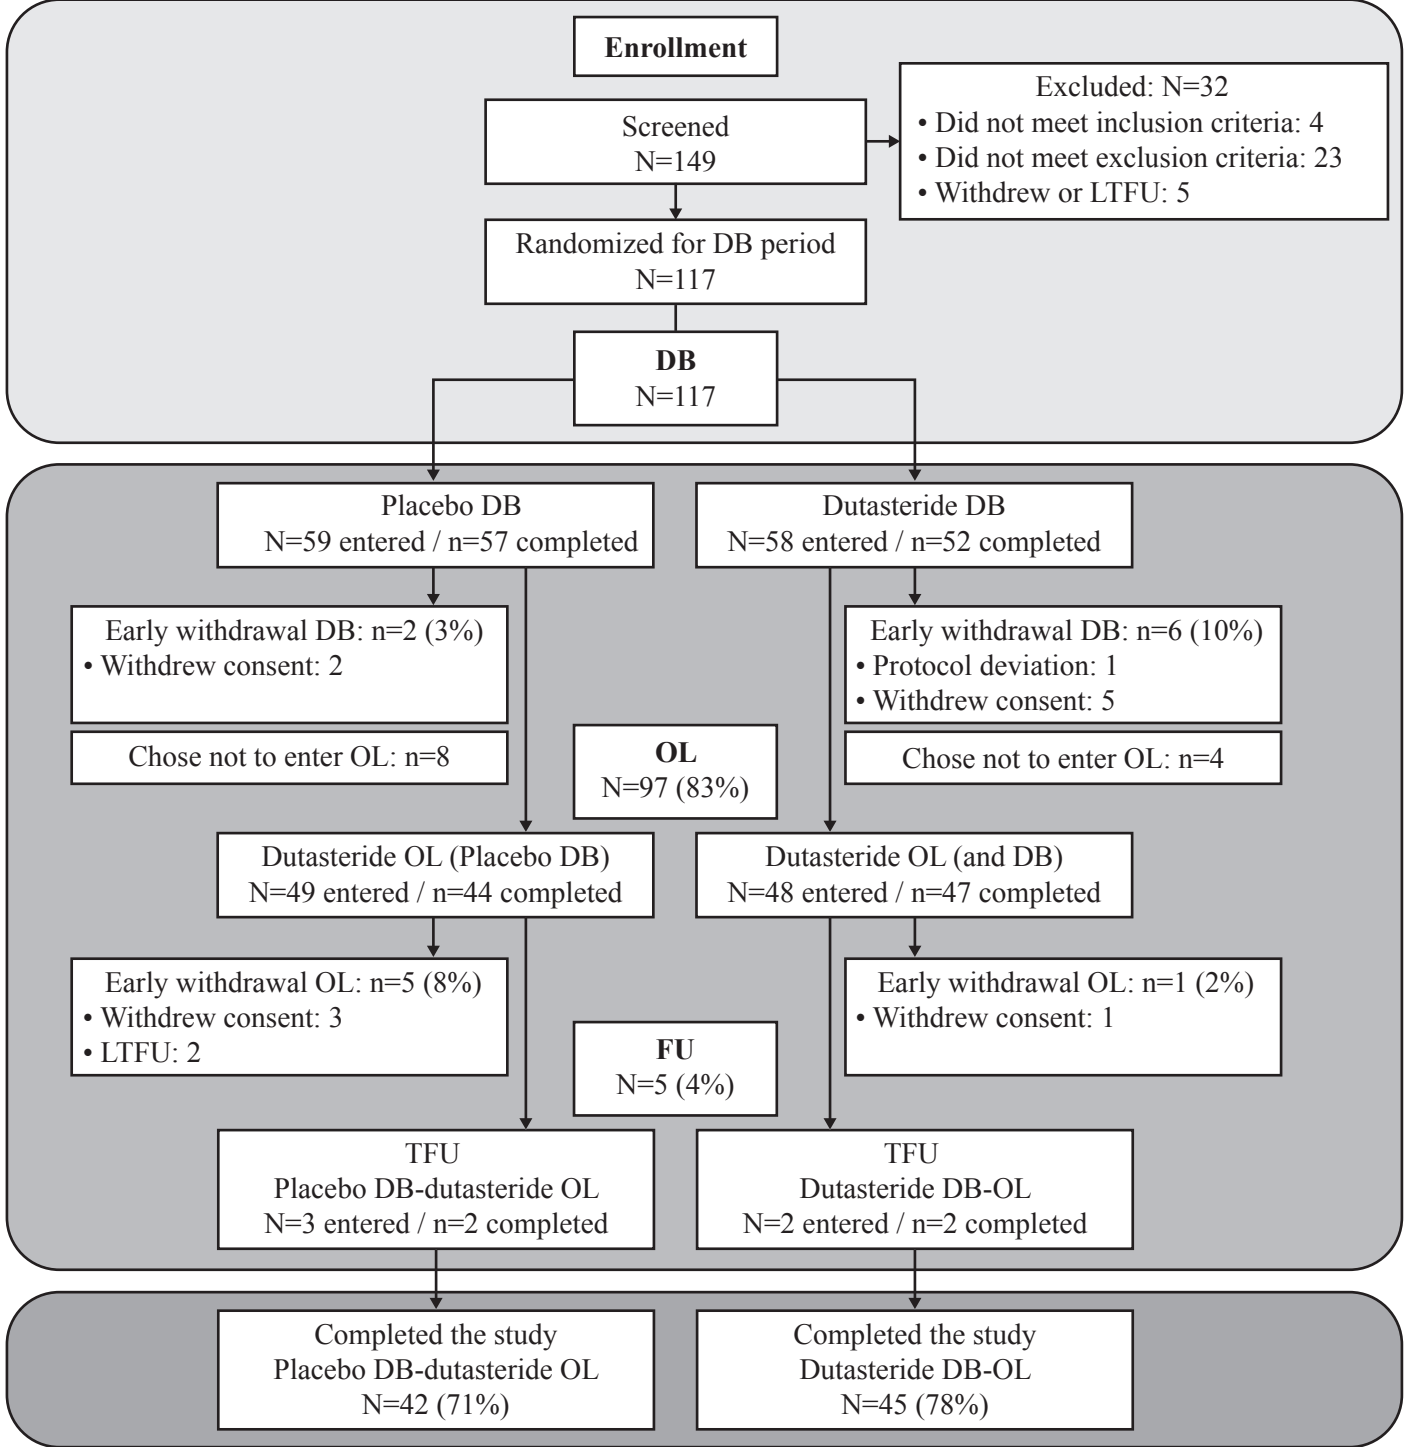

Supplement: JDE-45-799-s003.pdf [file JDE-45-799-s003.pdf]
